# Supplementary material
Source: Springer Nature journal article supplement (https://www.springermedizin.de/resource/supplementary/12888_2009_616_MOESM2_ESM.pdf/9483734)
Supplement: MOESM2 [file 9483734]

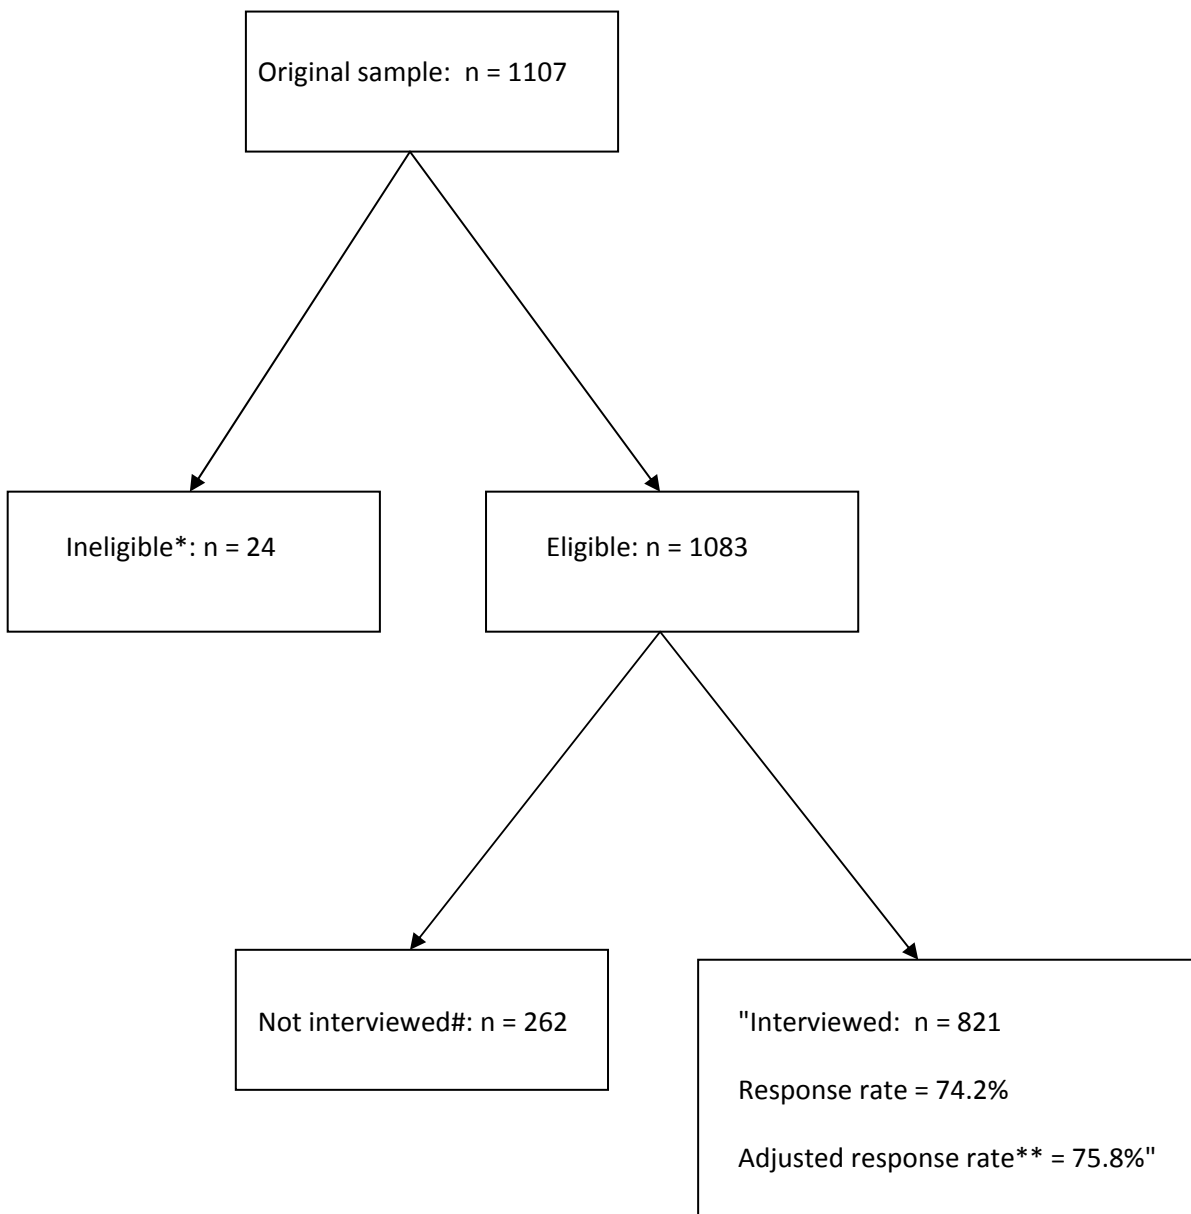

\*Those who had died, were deselected, or had incomplete phase 1 data.

\*\*Excludes those who had died, were deselected, or had incomplete phase 1 data.

#Those who declined to participate, could not be traced or were deployed or on a course at the time of interview
